# Supplementary material for: Estimation of the Actual Incidence of Coronavirus Disease (COVID-19) in Emergent Hotspots: The Example of Hokkaido, Japan during February–March 2020
Source: MDPI journal article supplement (doi:10.3390/jcm10112392), 2021-05-28
Supplement: s1 [file s1]

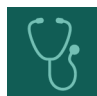

## Supplementary Materials

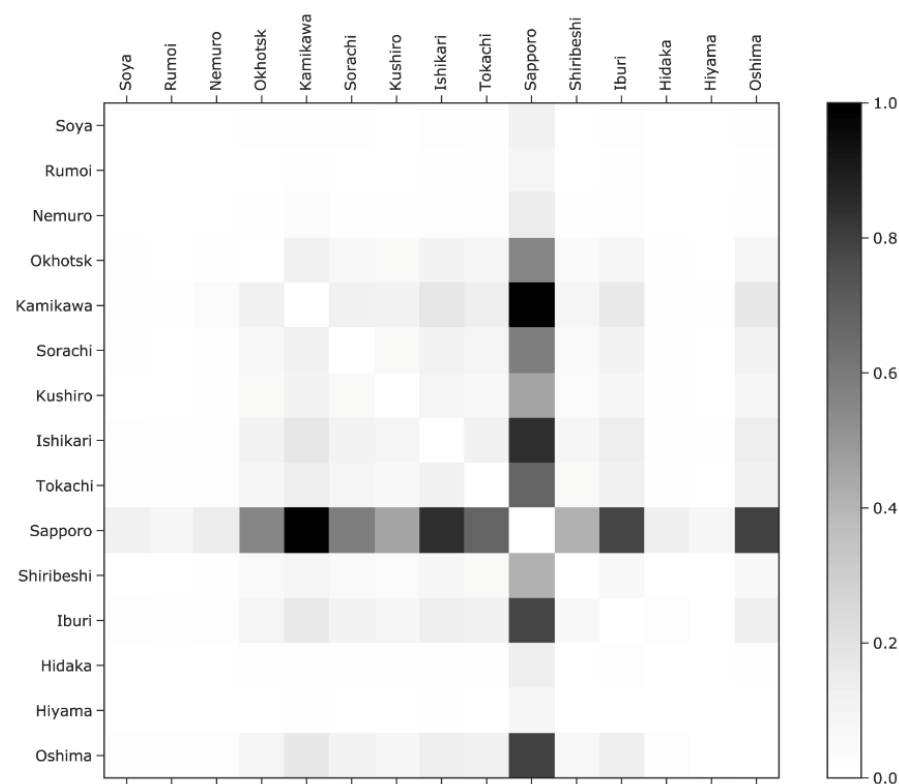

**Figure S1.** Reconstructed connectivity matrix between subprefectures of Hokkaido. Ishikari subprefecture was separated into two subregions: within Sapporo and outside of Sapporo. The grey-shaded heatmap indicates the relative intensity of travel volume. The resulting connectivity matrix was forced to be symmetric.

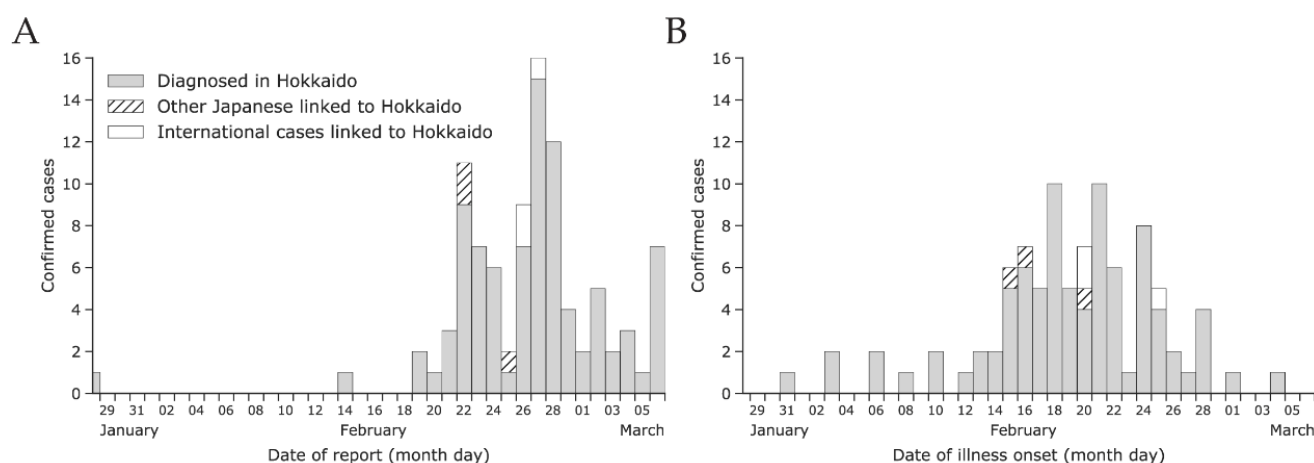

**Figure S2.** Epidemic curves by date of confirmation (A) and date of illness onset (B) as of 6 March 2020 for confirmed cases among Japanese nationals linked to Hokkaido.
